# Supplementary material for: Novel Splice Site Pathogenic Variant of EFTUD2 Is Associated with Mandibulofacial Dysostosis with Microcephaly and Extracranial Symptoms in Korea
Source: Diagnostics (Basel). 2020 May 12;10(5):296. doi: 10.3390/diagnostics10050296 (PMC7277841; doi:10.3390/diagnostics10050296)
Supplement: Supplementary file 1 [file diagnostics-10-00296-s001.xlsx]

## Sheet: Sheet1 (3)
Supplement table S1 The splice site variants elongation factor Tu GTP-binding domain containing 2 and clinical features of affected individuals.
Exon/Intron	Nucleotide Change	Protein Change	Clinical Phenotypes			Functional studies	References
			Intracranial phenotypes	Hearing loss	Extracranial phenotypes
intron3	NM_001258353.1:c.271+1G>A	NP_001245282.1:p.Glu91Aspfs*24	microcephaly micrognathia external ear anomaly	mixed	Congenital heart defects	Minigene assay	Current study
exon 2	c.105G>A (skip exon 2)	p.Thr3Asp37del	borderline microcephaly malar hypoplasia micrognathia midline submucouscleft palate external ear anomaly developmental delay	mixed	small VSD	RT-PCR	Huang et al 2015
intron 2	c.106-2A>G	p.?	microcephaly malar hypoplasia micrognathia external ear anomaly developmental delay	conductive (proband), mixed (mother)	NR		Huang et al 2015
intron 3 - exon 4	c.272-11_280del	p.Glu91Valfs*6	microcephaly malar hypoplasia micrognathia neonatal airway problem external ear anomaly developmental delay	mixed	Proximally-inserted thumbs cryptorchidism, branchial cleft sinus, limited forearm supination	RT-PCR	Huang et al 2015
intron 4	c.351-1G>A	p.?	microcephaly micrognathia esophageal atresia choanal atresia facial aymmetry external ear anomaly	conductive			Voigt et al 2013
intron 4	c.351-1G>C	p.?	NR	NR	NR		Lehalle et al 2014
intron 4	c.504-2G>T	p.?	microcephaly facial asymmetry mandibular hypoplasia malar hypoplasia micrognathia choanal atreisa zygomatic cleft hyperplastic supraorbital ridges (parent) external ear anomaly developmental delay seizure	sensorineural	small VSD		Luquetti et al 2013
intron 5	c.[427-2delA;427-7C>T]	p.?	microcephaly (proband) malar hypoplasia micrognathia midline cleft palate (proband) external ear anomaly developmental delay seizures (proband)	conductive (proband)			this report; Guion- Almeida et al 2009 (clinical description)
intron 6	c.492+1G>A	p.?	microcephaly malar hypoplasia micrognathia midline cleft palate (proband) external ear anomaly developmental delay	hearing loss (proband-mixed, mother-conductive)			Huang et al 2015
intron 7	c.529-1G>A	p.?	NR	NR	NR		Lehalle et al 2014
intron 8	c.619+1G>A	p.?	malar hypoplasia mandibular hypoplasia cleft palate esophageal atresia external ear anomaly conductive hearing loss developmental delay	conductive			Gordon et al 2012
intron 9	c.702+1del	p.?	NR	NR	NR		Huang et al 2015
intron 9	c.702+5G>C	p.?	NR	NR	NR		Huang et al 2015
intron 9	c.702+5G>A	p.?	borderline microcephaly malar hypoplasia micrognathia midline cleft palate external ear anomaly developmental delay	conductive	Proximally-inserted thumbs		Huang et al 2015
intron 11	c.994+1G>C	p.?	microcephaly facial asymmetry (parent) micrognathia (proband, sibling) esophageal atreisa(proband, sibling) zygomatic cleft hyperplastic supraorbital ridges (parent) external ear anomaly	hearing loss (conductive-proband, mixed-sibling)	ASD(proband), VSD (sibling)		Voigt et al 2013
intron 11	c.994+5G>A	p.?	external ear anomaly developmental delay	sensorineural	unilateral hypoplastic thumb fusion of cervical vertebrae C2 to C5		Need et al 2012
exon 12	c.1052del	p.(Pro351Leufs*35)	malar hypoplasia midline cleft palate external ear anomaly developmental delay	sensorineural (Mondini malformation)	small scrotum		Huang et al 2015
intron 12	c.1058+2dup NM_004247.3	p.?	microcephaly micrognathia cleft palate glossoptosis external ear anomaly narrow retropharyngeal airway developmental delay	mixed (ossicular anomaly)	fixed flexion deformity of both thumbs		Yu et al 2018
intron 13	c.1149+5G>T	p.?	microcephaly dysmorphic features developmental delay possible autism	sensorineural	spine anomalies		Need et al 2012
intron 16	c.1607+1G>A NM_004247.3	p.?	microcephaly midface hypoplasia micrognathia cleft palate external ear anomaly developmental delay	mixed (ossicular anomaly)	patent foreman ovale		Yu et al 2018
intron 16	c.1607+3A>G	p.?	malar hypoplasia mandibular hypoplasia cleft palate external ear anomaly developmental delay epilepsy	conductive	ASD		Lines et al 2012
intron 16	c.1608–1dupG NM_004247.3	p.?	microcephaly facial dysmorphology tracheoesophageal fistula poor growth cognitive disability refractory cyclic vomiting epilepsy	NR	NR		Bick et al 2017
exon 18 / intron 18	c.[1859A>T; 1860+3_1860+4delinsGA G]	p.Ala574_Lys620del	microcephaly micrognathia facial asymmetry palpebral fissures downslanding choanal atresia lacrimal duct anomaly hypertelorism malar hypoplasia broad base of nose external ear anomaly psychomotor delay speech delay somatic delay, microsomia	conductive	proximally placed thumbs camptodactyly	RT-PCR	Smigiel et al 2015
intron 18	c.1861-2A>G	p.?	microcephaly malar hypoplasia micrognathia external ear anomaly developmental delay	mixed	ASD hypoplastic R thumb cryptorchidism		Huang et al 2015
intron 19	c.1962+1G>A	p.?	NR	NR	NR		Huang et al 2015
intron 19	c.1963-2A>T	p.Val655Glufs*8	microcephaly malar hypoplasia micrognathia external ear anomaly developmental delay severe trismus	mixed	NR	RT-PCR	Huang et al 2015
intron 20	c.2045+1G>A	p.?	microcephaly malar hypoplasia micrognathia zygomatic arch hypoplasia external ear anomaly developmental delay	conductive	partial lacrimal duct obstruction		Huang et al 2015
intron 20	c.2045+2T>G	p.?	microcephaly malar hypoplasia micrognathia choanal atresia esophageal atresia external ear anomaly developmental delay	NA	hemivertebrae, unspecified limb anomalies		Huang et al 2015
intron 22	c.2259+1G>A	p.?	microcephaly facial asymmetry mandibular hypoplasia esophageal atresia external ear anomaly developmental delay	conductive	ASD		Gordon et al 2012
intron 24	c.2466+1G>A		left hemifacial microsomia metopic craniosynostosis choanal atresia orbital hypertelorism		VSD, patent foramen ovale		Lacour et al 2018
intron 24	c.2467-1G>T	p.?	NR	NR	NR		Lehalle et al 2014
intron 25	c.2562-2del	p.?	NR	NR	NR		Lehalle et al 2014
intron 25	c.2562-2_2562-1del	p.?	NR	NR	NR		Lehalle et al 2014
intron 25	c.2562-1G>A	p.?	NR	NR	NR		Lehalle et al 2014
intron 25	c.2562-1G>C	p.[=, Ala823_Gln895del, Gly855Metfs*75, Gly855Leufs*29]	microcephaly micrognathia esophageal atresia choanal stenosis hyperplastic supraorbital ridges external ear anomaly seizure	conductive	NR		Voigt et al 2013
intron 27	c.2823+1del	p.?	malar hypoplasia (proband) mandibular hypoplasia (proband) esophageal atresia external ear anomaly (proband)	mixed	brachydactyly (mother)		Gordon et al 2012, Lehalle et al 2014
intron 27	c.2823+1G>T	p.?	microcephaly malar hypoplasia micrognathia neonatal airway problem bilateral absence of zygomatic arch external ear anomaly developmental delay seizures trismus, radial head dislocation, syrinx, small corpus callosum with white matter / brain volume loss on MRI	conductive	Proximally-inserted thumbs 11 rib pairs		Huang et al 2015
	NR: Not Reported
